# Supplementary material for: Thieno[3,2-c]pyran: an ESIPT based fluorescence “turn-on” molecular chemosensor with AIE properties for the selective recognition of Zn2+ ion
Source: Royal Society of Chemistry journal article supplement (doi:10.1039/d0nj02236e), 2020-01-01
Supplement: d0nj02236e1.pdf [file d0nj02236e1.pdf]

## Supporting Information

### Thieno[3,2-*c*]pyran: ESIPT based fluorescence “turn-on” molecular chemosensor for selective recognition of Zn<sup>2+</sup> ion and AIE property

Divya Singhal,<sup>a</sup> Ismail Althagafi,<sup>b</sup> Ashish Kumar,<sup>a</sup> Saroj Yadav,<sup>a</sup> Ashok K. Prasad<sup>a</sup> and Ramendra Pratap<sup>a,\*</sup>

<sup>a</sup>Department of Chemistry, University of Delhi, North Campus, Delhi, India-110007

<sup>b</sup>Department of Chemistry, Umm Al-Qura University, Makkah, Saudi Arabia

*E-mail* [ramendrapratap@gmail.com](mailto:ramendrapratap@gmail.com)

| S. No.          |                                                                                                                       | Page No. |
|-----------------|-----------------------------------------------------------------------------------------------------------------------|----------|
| <b>Fig.S1</b>   | X ray Crystallography structure.                                                                                      | 2        |
| <b>Fig.S2</b>   | Hill plot.                                                                                                            | 4        |
| <b>Fig. S3</b>  | Concentration dependent emission spectra of Probe P (10 <sup>-3</sup> –10 <sup>-9</sup> ) M solution in acetonitrile. | 5        |
| <b>Fig.S4</b>   | Calibration curve for the calculation of detection limit for Zn <sup>2+</sup> ion.                                    | 6        |
| <b>Fig.S5</b>   | Job’s plot.                                                                                                           | 6        |
| <b>Fig.S6</b>   | <sup>1</sup> H NMR spectra of P with and without Zn <sup>2+</sup> DMSO- <i>d</i> <sub>6</sub> , 400 MHz.              | 7        |
| <b>Fig.S7</b>   | FTIR spectrum of probe P.                                                                                             | 7        |
| <b>Fig.S8</b>   | FTIR spectrum of P-Zn <sup>2+</sup> complex.                                                                          | 8        |
| <b>Fig.S9</b>   | <sup>1</sup> H NMR spectrum of probe P.                                                                               | 8        |
| <b>Fig.S10</b>  | <sup>1</sup> H NMR spectrum of P-Zn <sup>2+</sup> complex.                                                            | 9        |
| <b>Table S1</b> | Crystal data and structure refinement for Probe P                                                                     | 2        |
| <b>Table S2</b> | DFT energy table                                                                                                      | 9        |
|                 | Quantum yield calculations.                                                                                           | 9        |
| <b>Table S3</b> | Comparison of our work with previously reported literature.                                                           | 10       |



**Table S1:** Crystal data and structure refinement for Probe P

---

|                                   |                                                  |
|-----------------------------------|--------------------------------------------------|
| CCDC Number                       | 2000213                                          |
| Identification code               | 2000213                                          |
| Empirical formula                 | C <sub>15</sub> H <sub>10</sub> O <sub>5</sub> S |
| Formula weight                    | 302.29                                           |
| Temperature                       | 293(2) K                                         |
| Wavelength                        | 0.71073 Å                                        |
| Crystal system                    | Orthorhombic                                     |
| Space group                       | P c a 21                                         |
| Unit cell dimensions              | a = 13.2481(4) Å                                 |
| $\alpha = 90^\circ$ .             | b = 8.2931(3) Å                                  |
|                                   | $\beta = 90^\circ$ .                             |
|                                   | c = 12.1623(4) Å                                 |
|                                   | $\gamma = 90^\circ$ .                            |
| Volume                            | 1336.25(8) Å <sup>3</sup>                        |
| Z                                 | 4                                                |
| Density (calculated)              | 1.503 Mg/m <sup>3</sup>                          |
| Absorption coefficient            | 0.261 mm <sup>-1</sup>                           |
| F(000)                            | 624                                              |
| Crystal size                      | 0.22 x 0.20 x 0.18 mm <sup>3</sup>               |
| Theta range for data collection   | 3.502 to 29.518°.                                |
| Index ranges                      | 18<=h<=18, -11<=k<=11, -16<=l<=16                |
| Reflections collected             | 18574                                            |
| Independent reflections           | 3407 [R(int) = 0.0434]                           |
| Completeness to theta = 25.242°   | 99.6 %                                           |
| Refinement method                 | Full-matrix least-squares on F <sup>2</sup>      |
| Data / restraints / parameters    | 3407 / 1 / 190                                   |
| Goodness-of-fit on F <sup>2</sup> | 0.648                                            |
| Final R indices [I>2sigma(I)]     | R1 = 0.0453, wR2 = 0.1124                        |
| R indices (all data)              | R1 = 0.0728, wR2 = 0.1453                        |
| Absolute structure parameter      | 0.03(5)                                          |
| Extinction coefficient            | n/a                                              |
| Largest diff. peak and hole       | 0.175 and -0.175 e.Å <sup>-3</sup>               |

---

### Hill Plot

The binding constant  $\log \beta$  for **P** with  $\text{Zn}^{2+}$  ion was determined by Hill plot. A graph was plotted between  $\log [(I - I_0)/I_{\text{max}} - I]$  against  $\log [\text{Zn}^{2+}]$ , where  $I$ ,  $I_0$  and  $I_{\text{max}}$  are the emission intensity of **P**, minimum and maximum intensity in the presence of metal ions respectively.

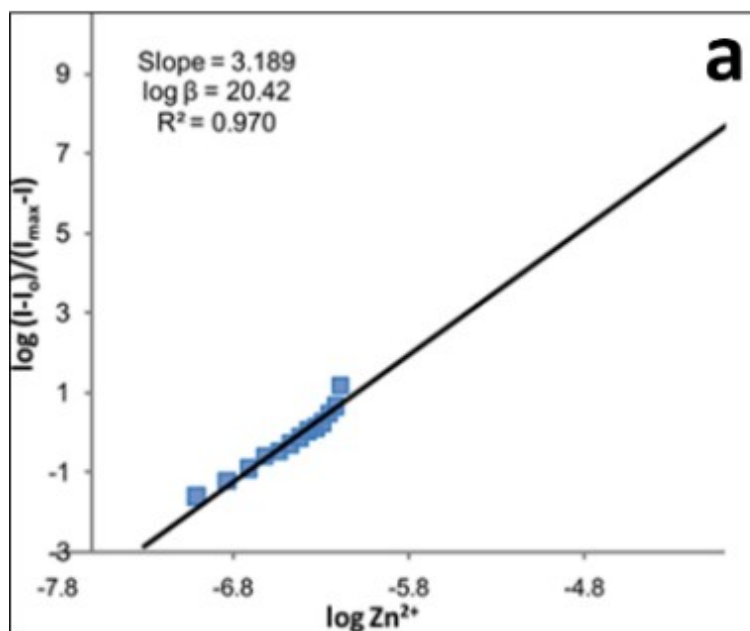

**Fig. S2: Hill plot.**

### Concentration dependent emission spectra<sup>1</sup>

Moreover, the concentration-dependent fluorescence was studied for probe **P** to know the molecular form present in solution, which decide the fluorescence intensity variation. A concentration of  $10^{-3}$  -  $10^{-9}$  M of probe **P** was maintained; at very low concentration, the band was occurred at 461 nm with extra band of 426 and 402 nm and on increasing the conc. a band of 484 nm was noted which became prominent ( $10^{-5}$  -  $10^{-9}$  M) whereas the maximum intensity was observed in  $10^{-9}$  M solution (**Fig. S3**). Hence, the fluorescence behaviour is sensitive to the concentration of the solution. On gradual increment of concentration, the intensity became somewhat significant, although these compounds were almost nonemissive in the solution state. Such occurrence can also be depicted by the fast intramolecular proton transfer process, which can serve as a nonradiative relaxation decay path.

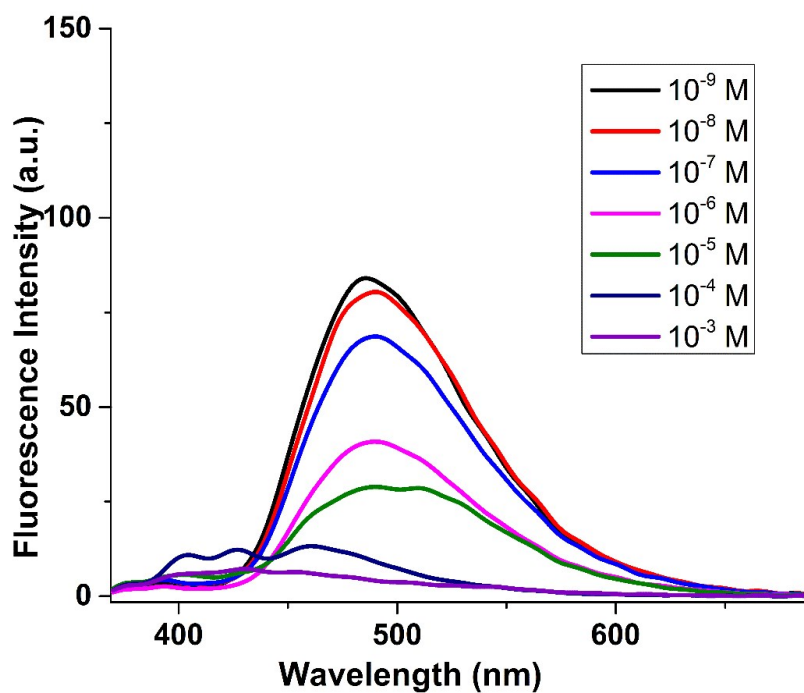

**Fig. S3:** Concentration dependent emission spectra of Probe P ( $10^{-3}$ – $10^{-9}$  M solution in acetonitrile).

### Limit of Detection (LOD)

The detection limit was calculated using Eq. 1.

$$LOD = \frac{3\sigma}{k} \quad (1)$$

Where  $\sigma$  is the standard deviation of 10 consecutive scan of blank solution (Probe P, 20  $\mu$ M) and  $k$  is the slope of a plot of emission intensity with metal ion concentration.

$$LOD = \frac{3 \times 1.54}{6.8014}$$

$$LOD = 0.679 \mu\text{M}$$

So the limit of detection of probe P for zinc metal ion is 0.67  $\mu$ M.

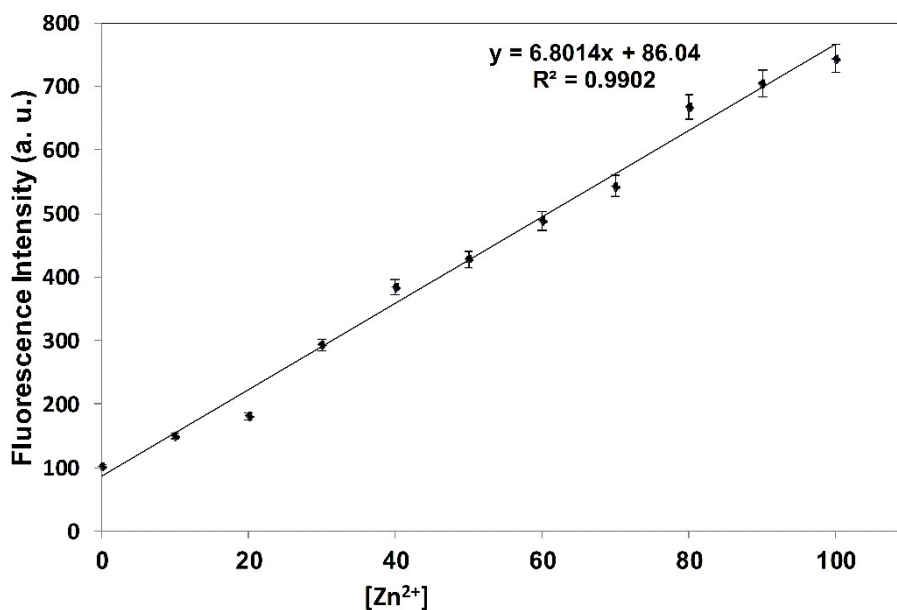

**Fig. S4: Calibration curve for the calculation of detection limit for Zn<sup>2+</sup> ion.**

#### Job's Plot

Binding stoichiometry of Zn<sup>2+</sup> complexes determined by Job's plot. In this method, equimolar solutions of P and Zn<sup>2+</sup> (50 μM) were prepared in acetonitrile solvent and the absorbance were recorded with different mole fraction of chemosensor P and metal ion.

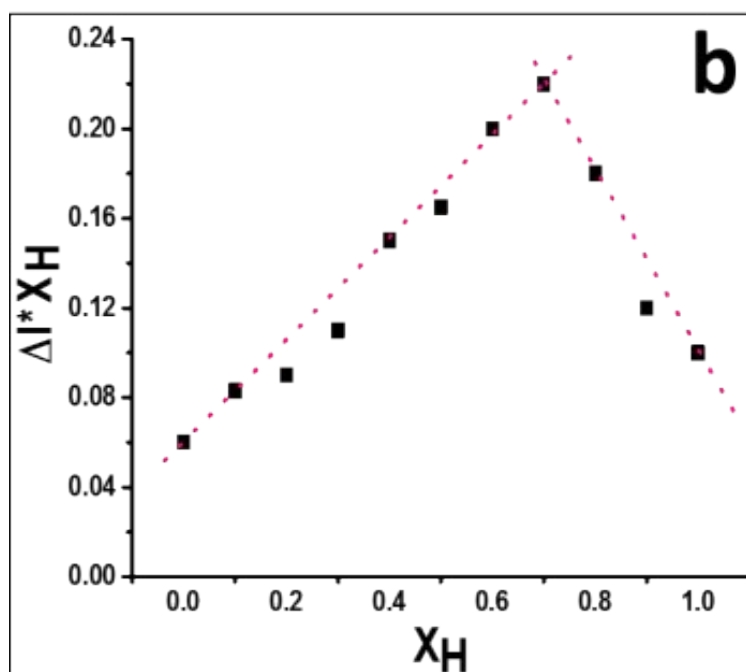

**Fig. S5: Job's Plot.**

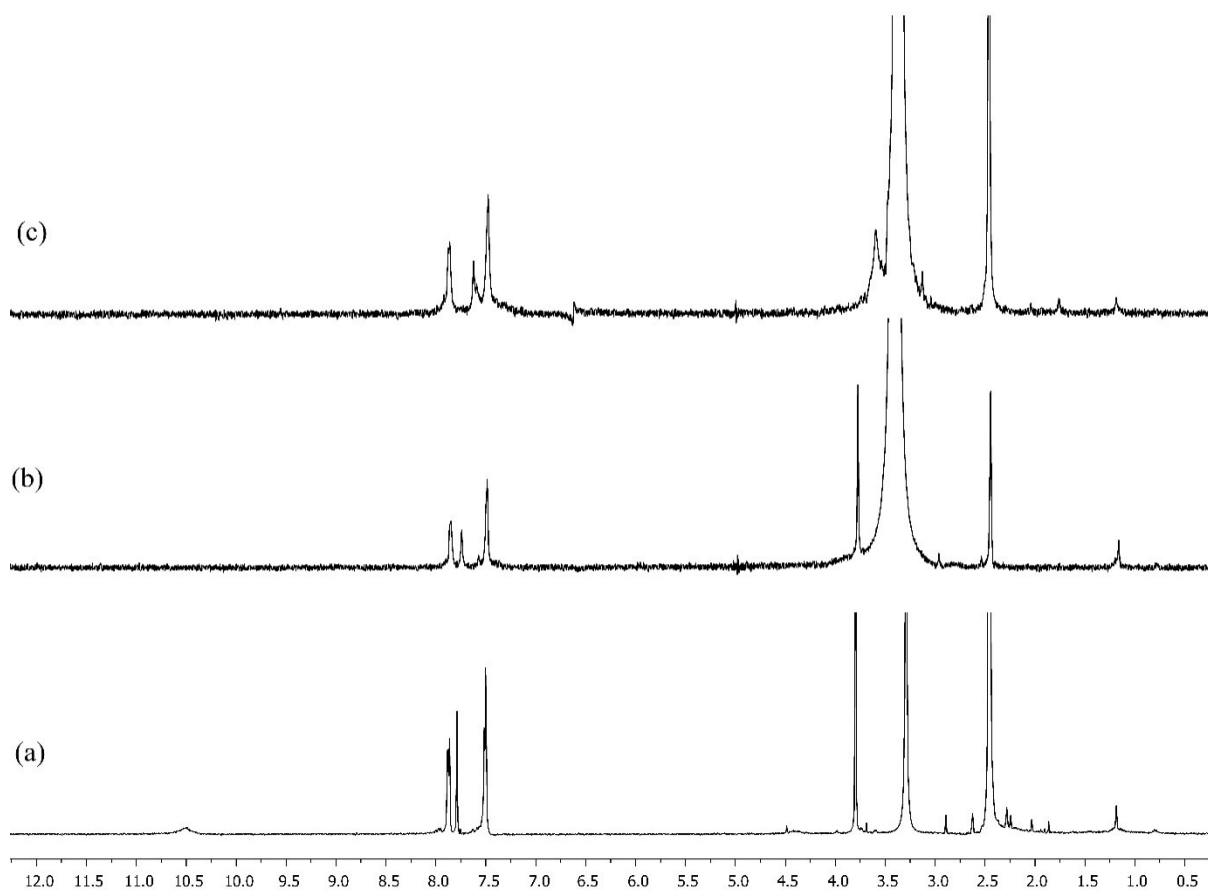

**Fig. S6:**  $^1\text{H}$  NMR spectra of P with and without  $\text{Zn}^{2+}$  DMSO- $d_6$ , 400 MHz; (a) probe P, (b) with 0.5 equi. of  $\text{Zn}^{2+}$ , (c) with 1 equi. of  $\text{Zn}^{2+}$  ion.

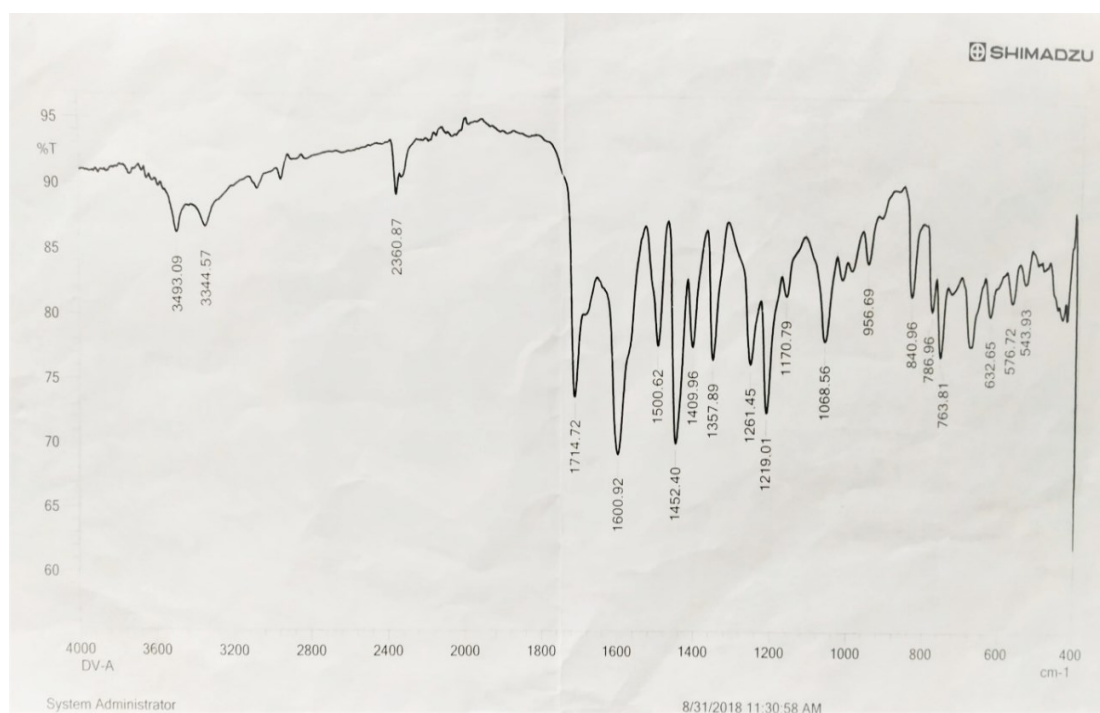

**Fig. S7:** FTIR spectrum of P.

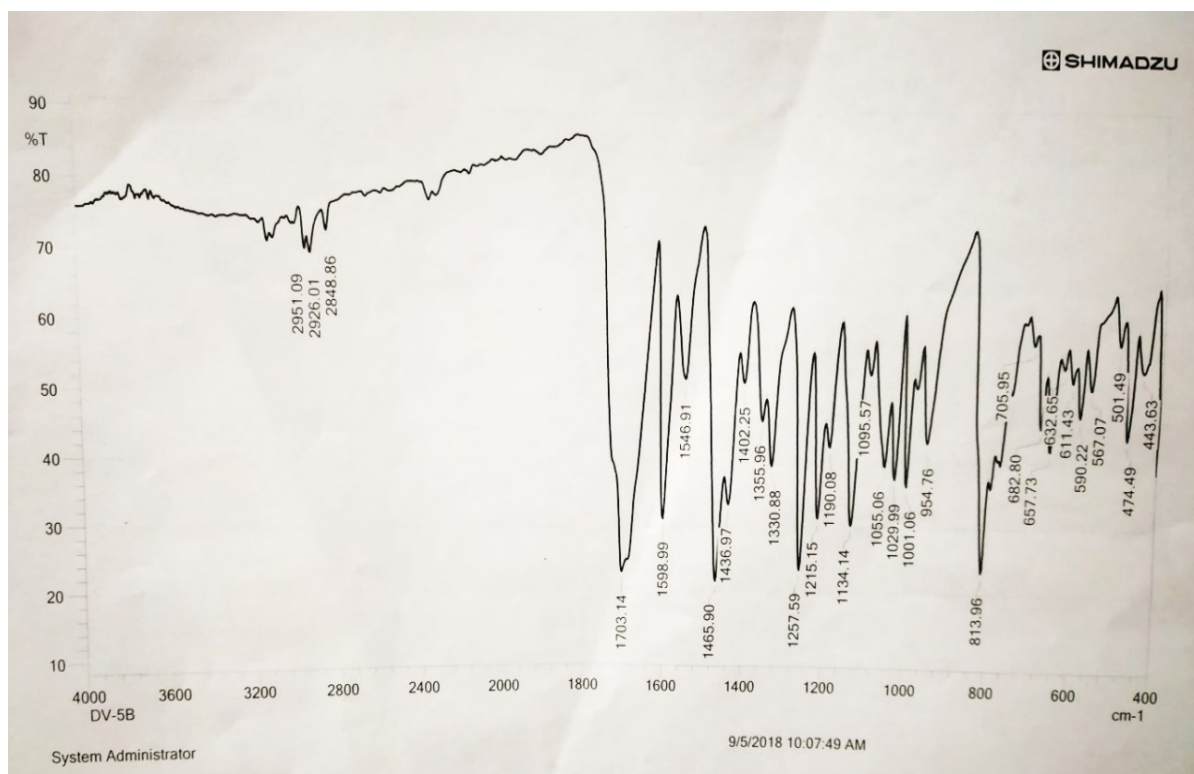

**Fig. S8: FTIR spectrum of P-Zn<sup>2+</sup> complex.**

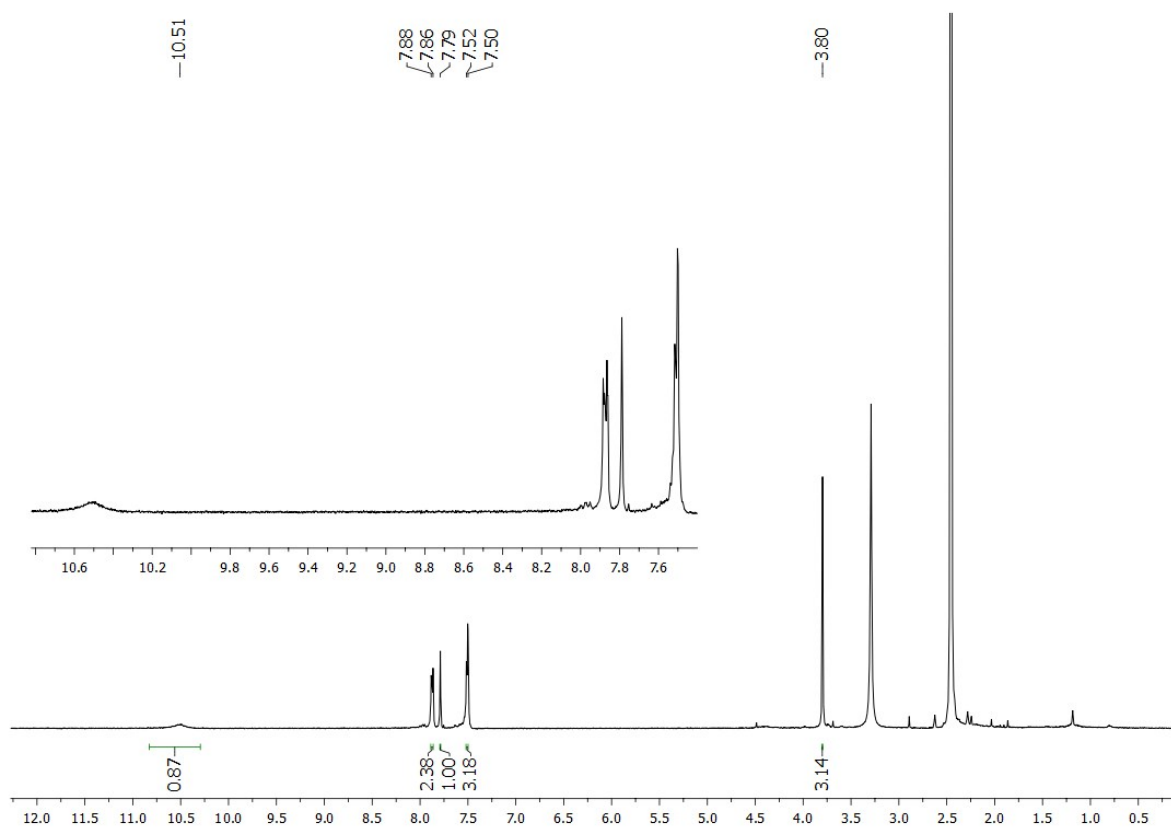

**Fig. S9: <sup>1</sup>H NMR spectrum of probe P.**



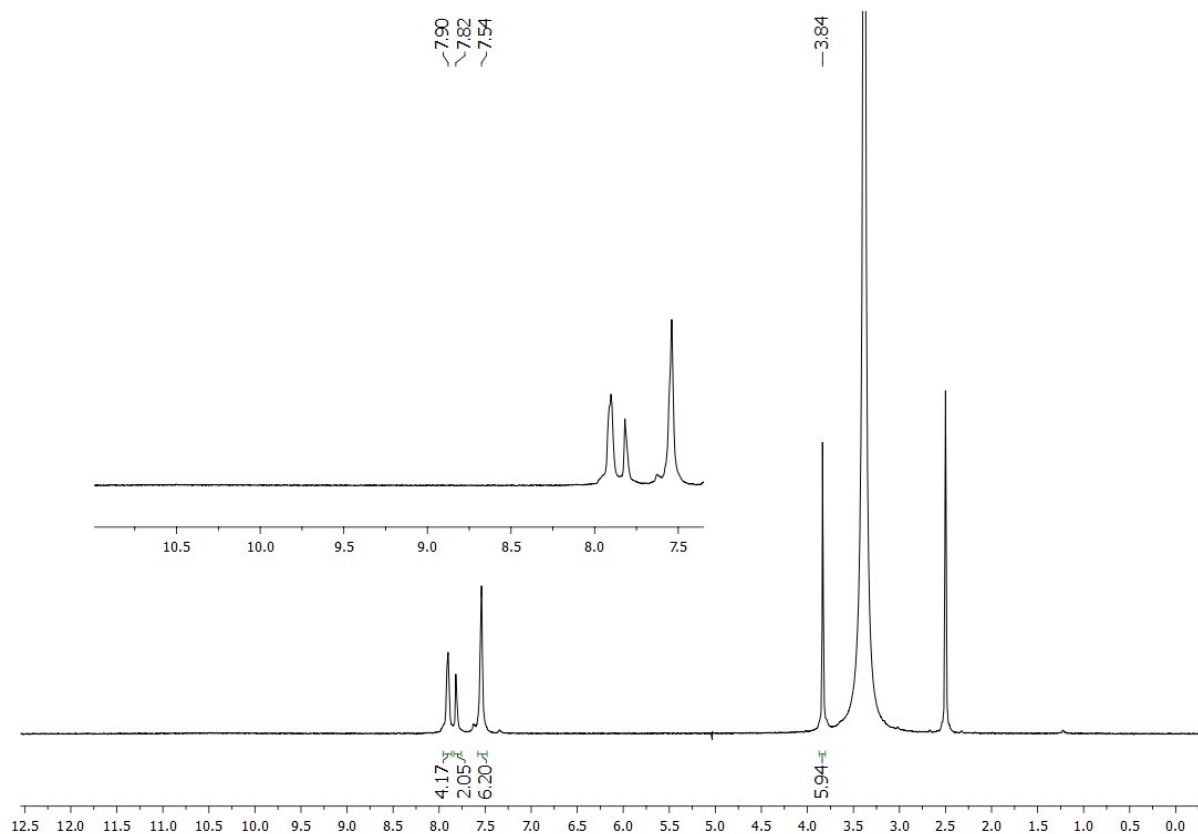

**Fig. S10:**  $^1\text{H}$  NMR spectrum of  $\text{P-Zn}^{2+}$  complex.

**Table S2:** Data of optimized geometries of probe **P** and  $\text{P-Zn}^{2+}$  complex.

| compound                 | HOMO   | LUMO   | Band Gap (eV) |
|--------------------------|--------|--------|---------------|
| <b>P</b>                 | -7.938 | -5.902 | 2.036         |
| <b>P-Zn<sup>2+</sup></b> | -8.498 | -8.336 | 0.161         |

Theoretical values at B3LYP/6-31G(d,p) and LANL2DZ level.

### Quantum Yield

The relative fluorescence quantum yields were determined with quinine sulphate **B** ( $\Phi_S = 0.54$ ) in 0.1 M  $\text{H}_2\text{SO}_4$  as a standard and calculated using the following equation 2.

$$\Phi_X = \Phi_S \times (I_X/I_S) \times (A_S/A_X) \times (\eta_X/\eta_S)^2 \quad (2)$$

Where  $\Phi$  represents quantum yield;  $A$  is absorbance at the excitation wavelength;  $\lambda_{\text{ex}}$  is the excitation wavelength;  $\eta$  is refractive index of the solution and subscripts  $x$  and  $s$  refer to unknown and standard samples respectively.

**Table S3 Comparison of our work with previously reported literature.**

| Previously reported literature                             | Solvent                         | Detection limit                      | Aggregation phenomenon |
|------------------------------------------------------------|---------------------------------|--------------------------------------|------------------------|
| Schiff base derivative of pyridoxal <sup>2</sup>           | DMSO                            | 0.87 $\mu\text{M}$                   | –                      |
| Pyrene pyridoxal <sup>3</sup>                              | DMSO                            | 2.3 $\mu\text{M}$                    | –                      |
| Quinoline derivative <sup>4</sup>                          | DMF/H <sub>2</sub> O (7/3, v/v) | 10 $\mu\text{M}$                     | –                      |
| Schiff base derivative of Purine based <sup>5</sup>        | Methanol                        | 2 $\mu\text{M}$                      | –                      |
| Schiff base derivative of Julolidine <sup>6</sup>          | DMF                             | 3.3 $\mu\text{M}$                    | –                      |
| Schiff base derivative of Juloidine-imidazole <sup>7</sup> | DMF                             | 15.6 $\mu\text{M}$                   | –                      |
| Tetrazolylpyridine <sup>8</sup>                            | H <sub>2</sub> O                | 0.75 $\mu\text{M}$                   | –                      |
| Schiff base derivative of Crown ether . <sup>9</sup>       | H <sub>2</sub> O                | 1 $\mu\text{M}$                      | –                      |
| Cyclam-Based “Clickates” <sup>10</sup>                     | Acetonitrile                    | 75 $\mu\text{M}$                     | –                      |
| Porphyrin <sup>11</sup>                                    | Ethanol                         | 1.8 $\mu\text{M}$                    | –                      |
| Hydrazine <sup>12</sup>                                    | DMF/H <sub>2</sub> O            | 0.11 $\mu\text{M}$                   | AIEE                   |
| Terpyridine-based ligand <sup>13</sup>                     | DMSO/H <sub>2</sub> O           | –                                    | AIE                    |
| <b>This work</b>                                           | <b>Acetonitrile</b>             | <b>0.67 <math>\mu\text{M}</math></b> | <b>AIE</b>             |

## References

- 1 M. Z. K.Baig, B.Prusti, D. Roy and M. Chakravarty, *ACS Omega* 2019, **4**, 5052–5063.
- 2 T. Anand, A. S. K. Kumar and S. K. Sahoo, *Photochem. Photobiol. Sci.*, 2018, **17**, 414–422.
- 3 Y. Upadhyay, T. Anand, L. T. Babu, P. Paira, G. Crisponi, A. K. S. Kumar, R. Kumar and S. K. Sahoo, *Dalton Trans.*, 2018, **47**, 742–749.
- 4 Z. Dong, X. Le, P. Zhou, C. Dong and J. Ma, *RSC Adv.*, 2014, **4**, 18270–18277.
- 5 Pratibha, S. Singh, S. Sivakumar and S. Verma, *Eur. J. Inorg. Chem.* 2017, 4202–4209.
- 6 G. J. Park, Y. J. Na, H. Y. Jo, S. A. Lee, A. R. Kim, I. Noh and C. Kim, *New J. Chem.* 2014, **38**, 2587–2594.
- 7 Y. W. Choi, G. J. Park, Y. J. Na, H. Y. Jo, S. A. Lee, G. R. You and C. Kim, *Sensor Actuat B-Chem* 2014, **194**, 343–352.

- 8 P.Kaleeswaran, I. A. Azath, V.Tharmaraj, and K. Pitchumani, *ChemPlusChem*2014, **79**,1361–1366.
- 9 D.A. Safin, M. G. Babashkina and Y. Garcia, *Dalton Trans.* 2013, **42**, 1969–1972.
- 10 Y. Lv, M. Cao, J. Li and J. Wang, *Sensors* 2013, **13**, 3131–3141.
- 11 E.Tamanini, K. Flavin, M. Motevalli, S.Piperno, L. A. Gheber, M. H. Todd, and M. Watkinson, *Inorg. Chem.* 2010, **49**, 3789–3800.
- 12 M.Shyamal, P.Mazumdar, S.Maity, S.Samanta, G. P. Sahoo, and A.Misra, *ACS Sens.* 2016, **1**, 739–747.
- 13 S. H. Jung, K. Y. Kwon and J. H. Jung, *Chem. Commun.*, 2015,**51**, 952–955.
